# Supplementary material for: Transcription of G-quartet supramolecular aggregates into hierarchical mesoporous silica nanotubes
Source: Royal Society of Chemistry journal article supplement (doi:10.1039/c6dt00075d), 2016-01-01
Supplement: c6dt00075d1.pdf [file c6dt00075d1.pdf]

## Electronic supplementary Materials

### Transcription of G-quartet Supramolecular Aggregates into Hierarchical Mesoporous Silica Nanotubes

Liang Min<sup>a, b</sup>, Tao Li<sup>c</sup>, Qi Tan<sup>a</sup>, Xiaoping Tan<sup>a</sup>, Wu Pan<sup>a</sup>, Li He<sup>a</sup>, Jie Zhang<sup>a</sup>, Encai Ou<sup>\*a</sup>, Weijian Xu<sup>\*a</sup>

<sup>a</sup>State key Labrotory for chemo/biosensing and chemometrics, college of chemistry and chemical engineering, Hunan University, Changsha, 410082, P. R. Chian. E-mail: weijxu@hnu.edu.cn (Weijian Xu) ouencaionc@aliyun.com (Encai Ou)

<sup>b</sup>Department of Resources and Environmental Sciences, Baoshan College, Baoshan, Yunnan, 678000, P. R. China

<sup>c</sup>College of Materials science and Engineering, Hunan Universtity, Changsha, 410082, P. R. China.

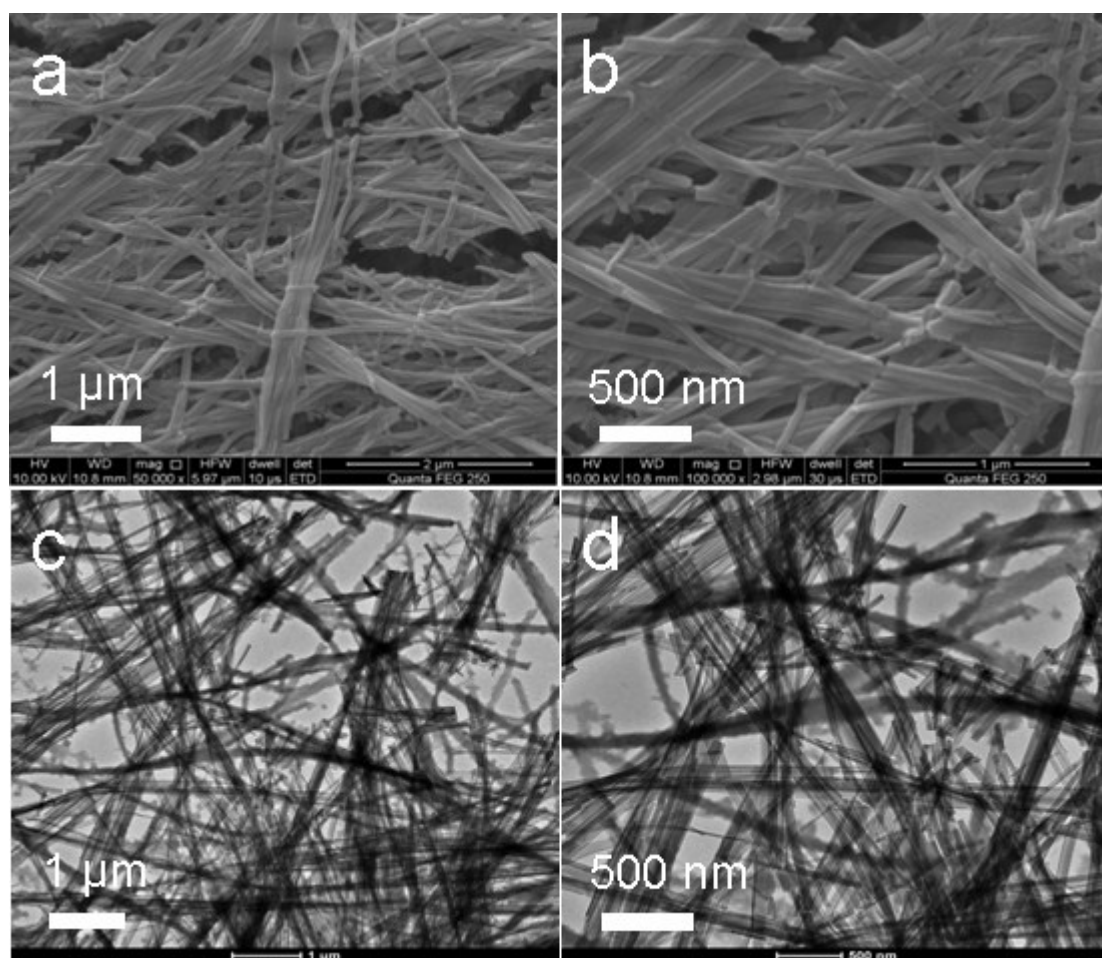

**Fig. S1.** SEM images of G-quartet supramolecular templates (a, b), and its corresponding TEM images (c, d).

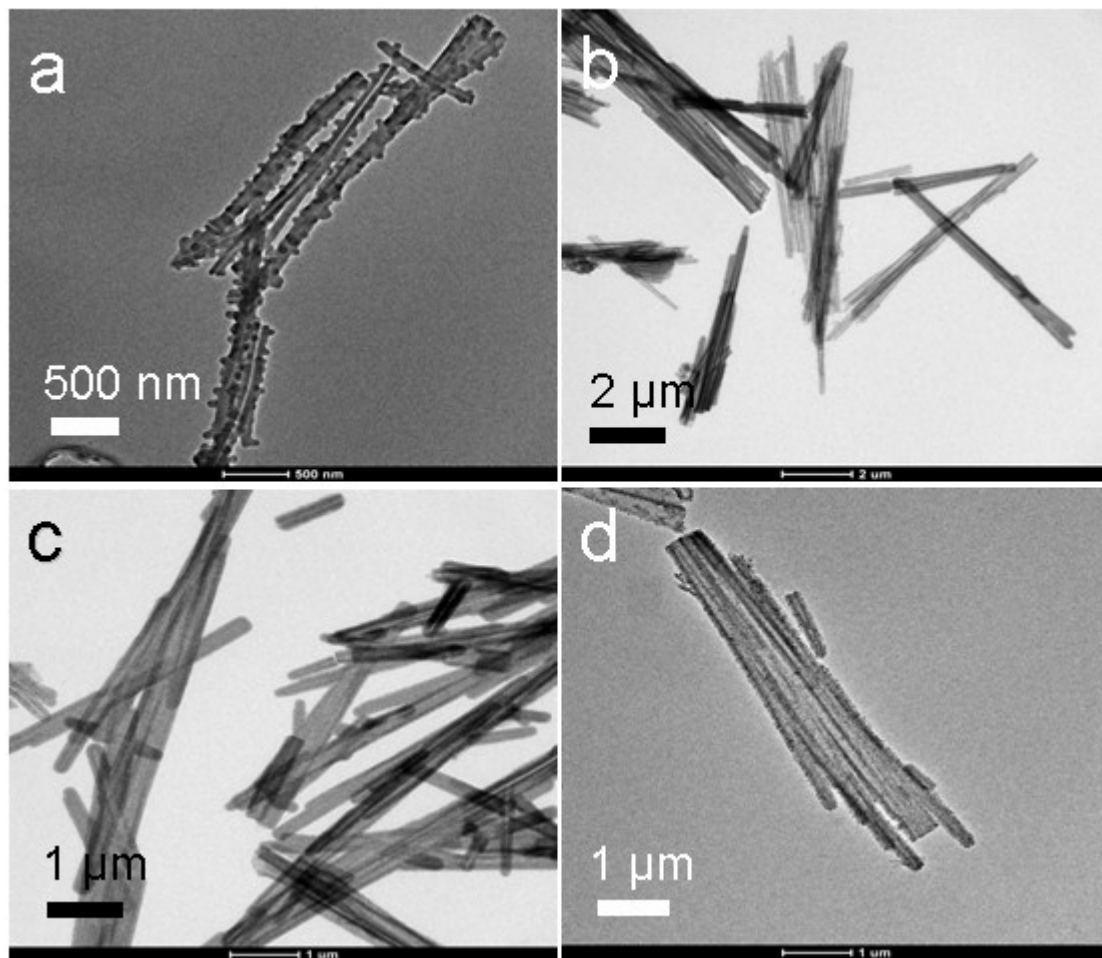

**Fig. S2** TEM image of as-obtained-a (a), e-GMP-a (b), c-GMP-a (c) and Au adsorbed e-GMP-a (d).

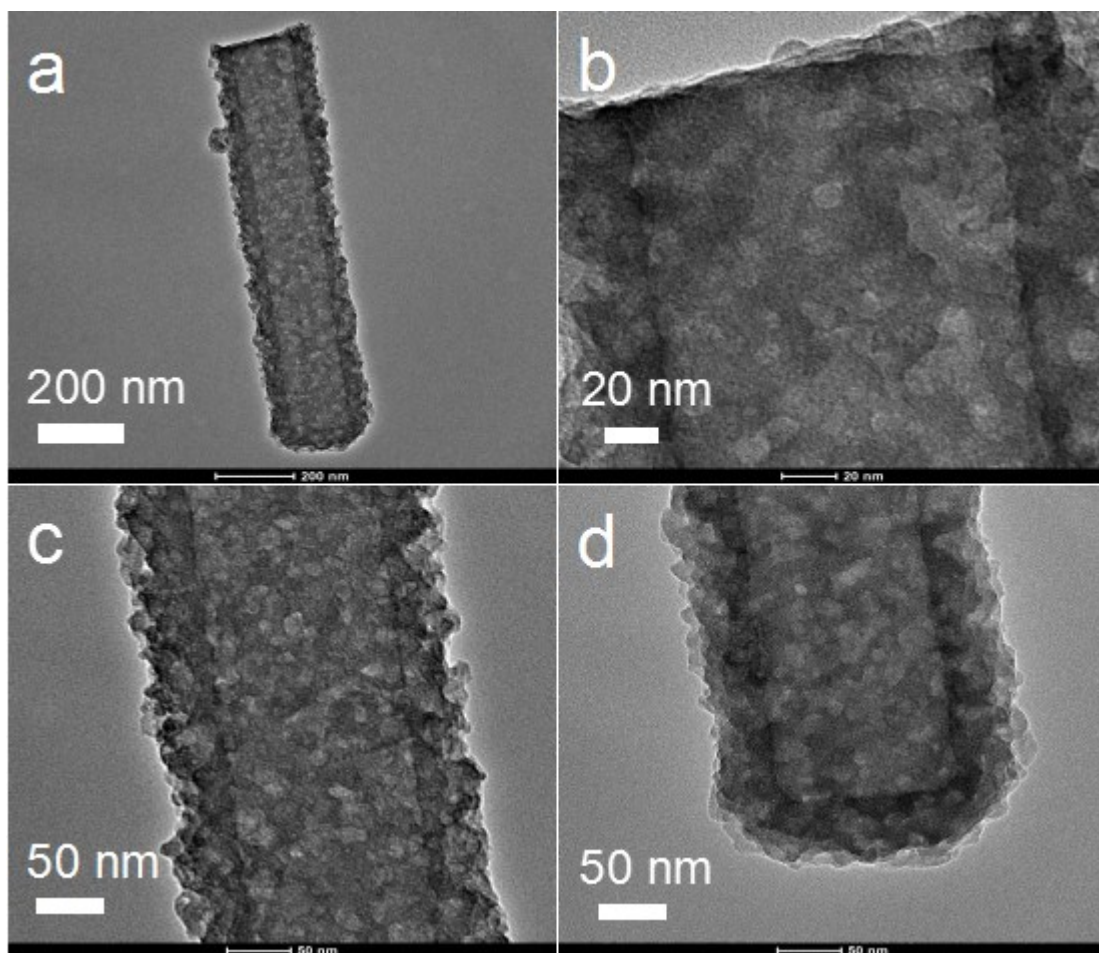

**Fig. S3** TEM images of eGMP-a, and image a shows one end closed nanotube, and images of b-d is magnified picture of the nanotube in the image a.

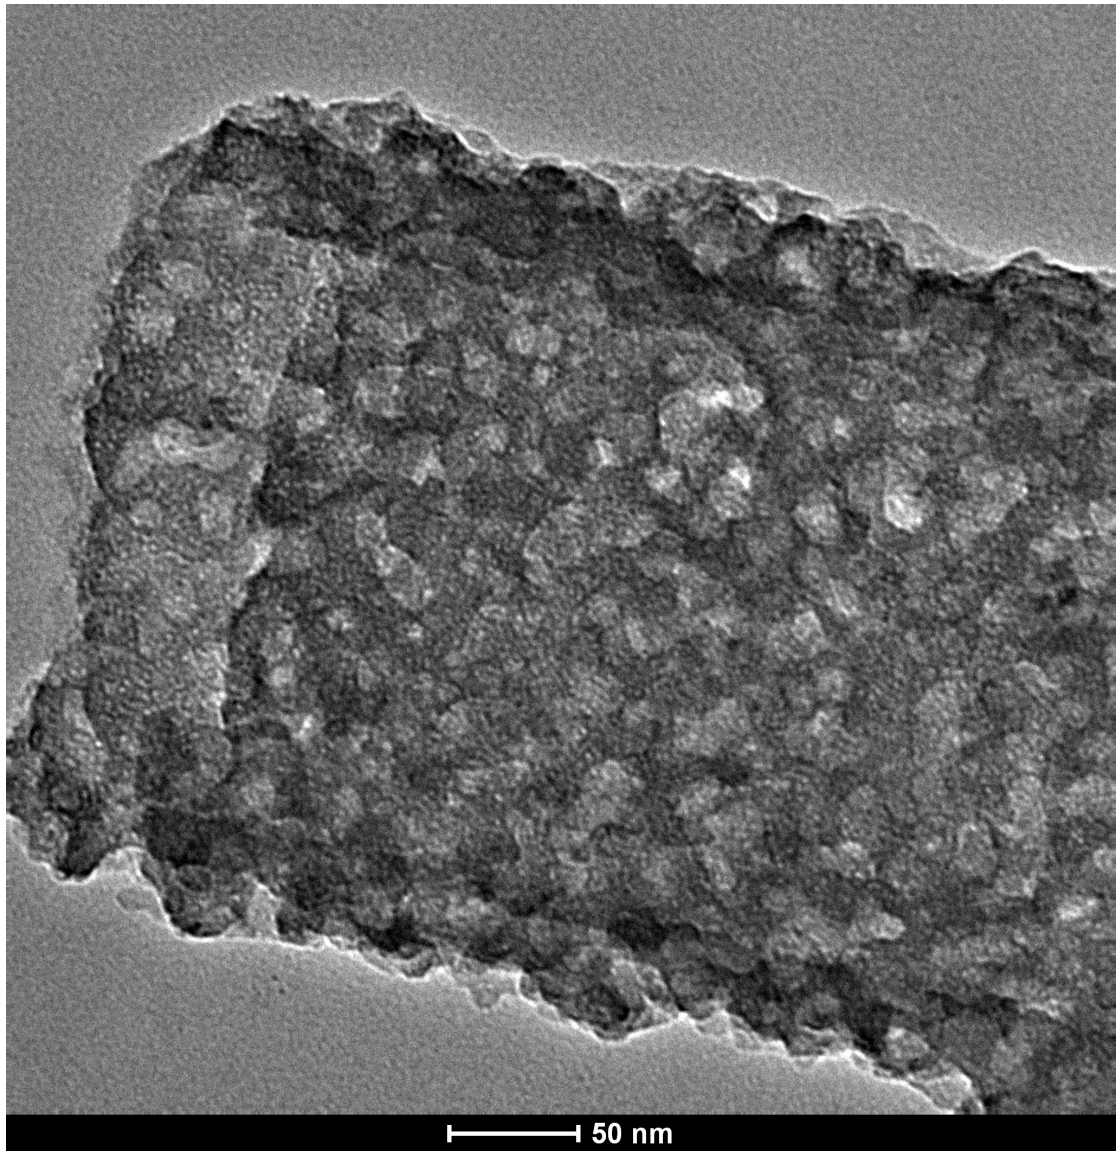

Fig. S4 TEM image of eGMP-a.

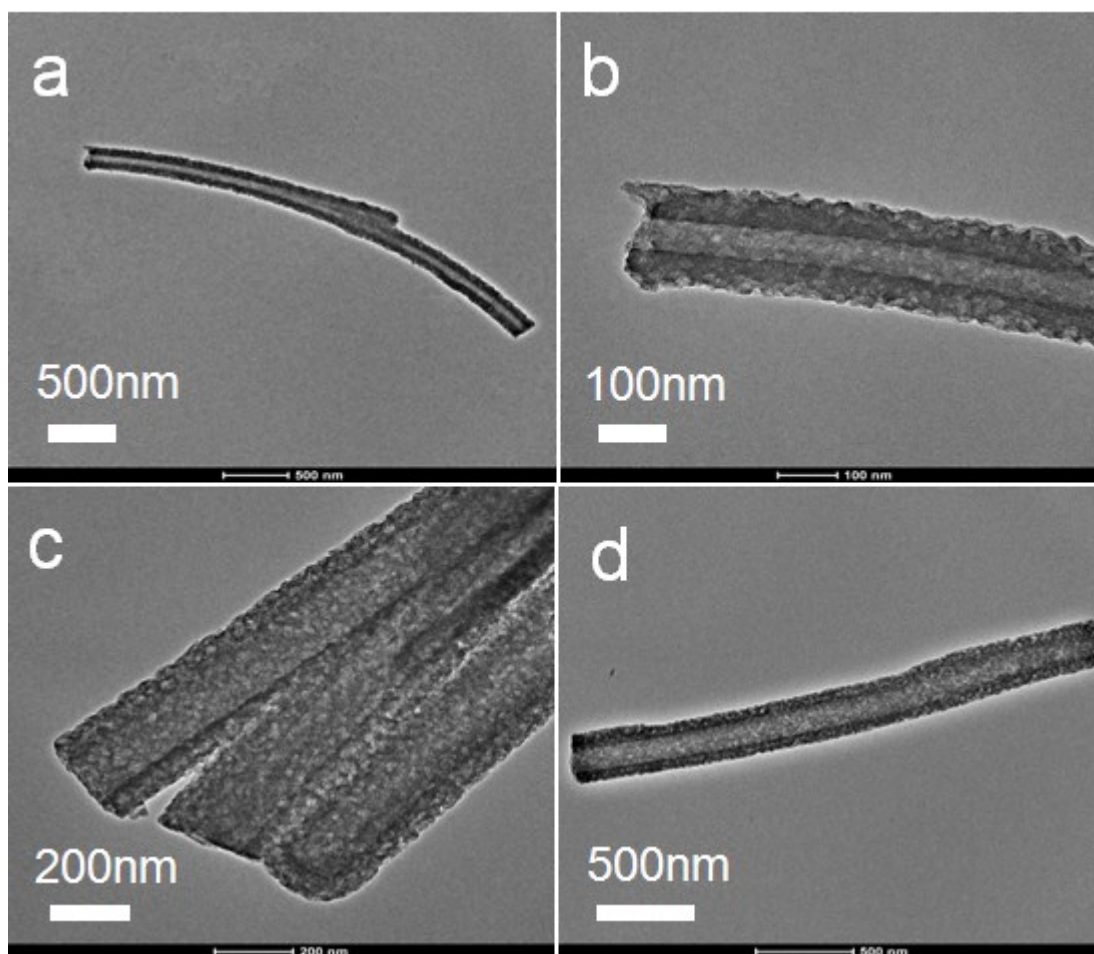

**Fig. S5** TEM images of cGMP-a, and image b is magnified picture of the end part of nanotube in the image a; and image c shows one end closed nanotube, and curved nanotubes are spotted as it showed in image a and d.



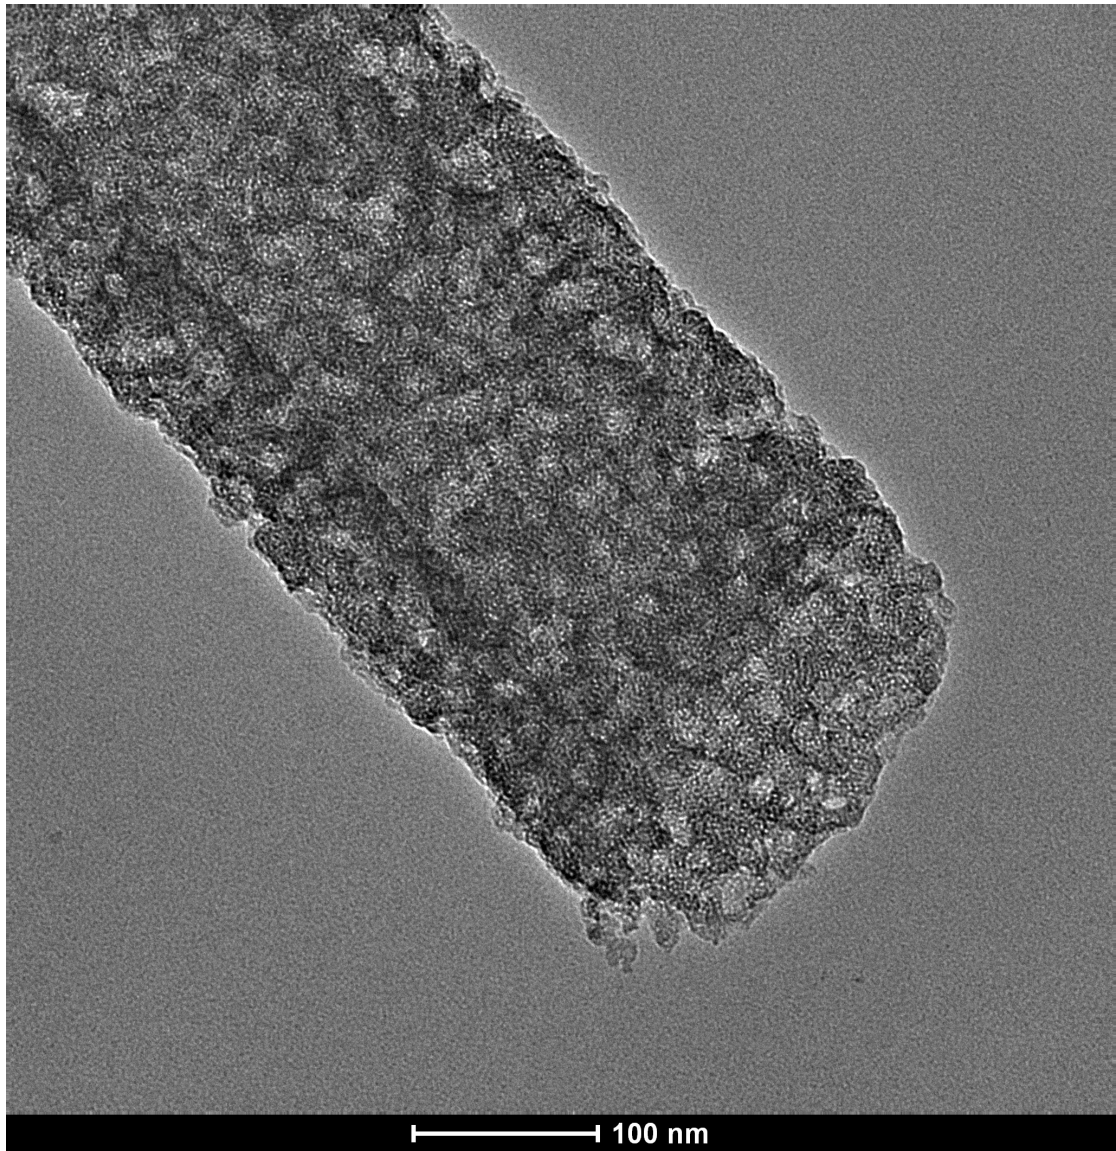

Fig. S6 TEM image of cGMP-a..

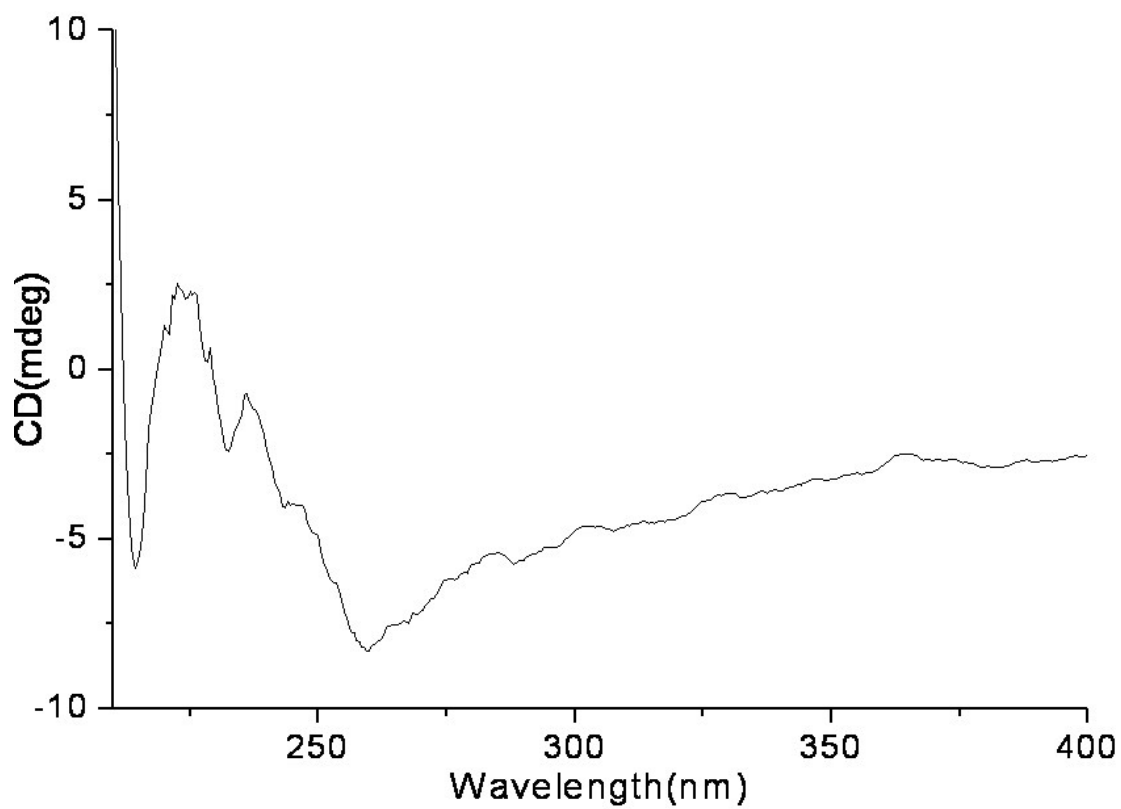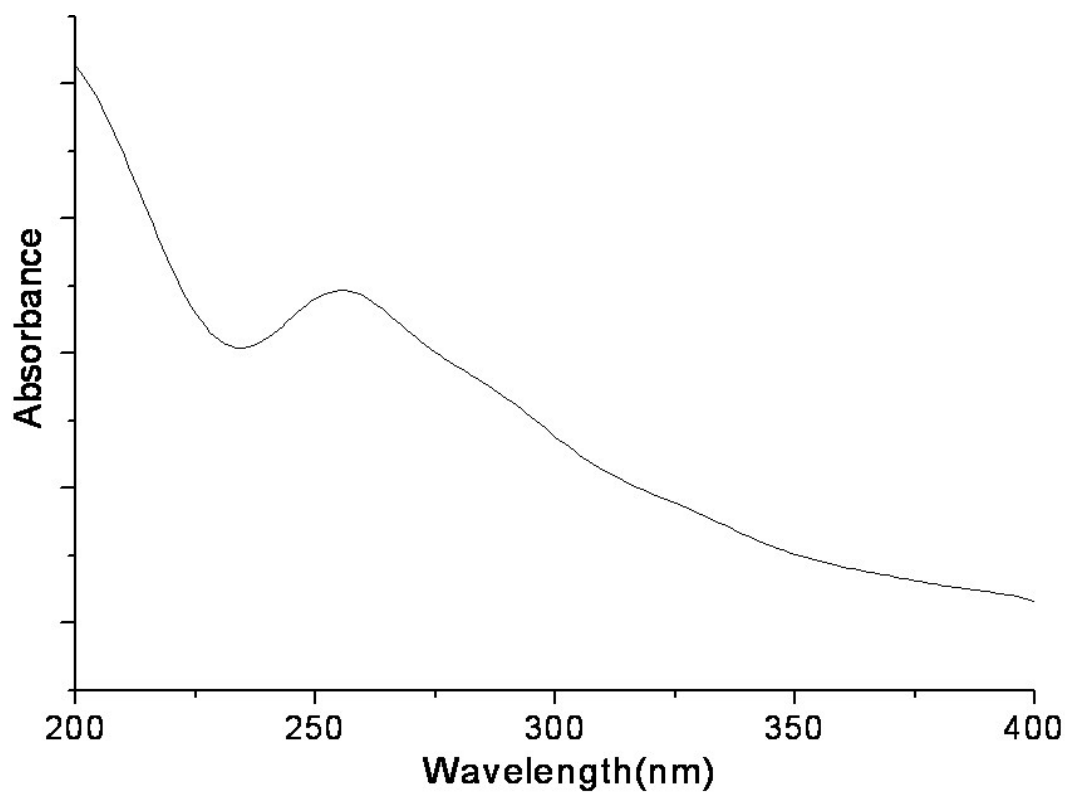

Fig. S7 Solid circular dichroism curve of h-GMP-a and its corresponding absorbance curve.

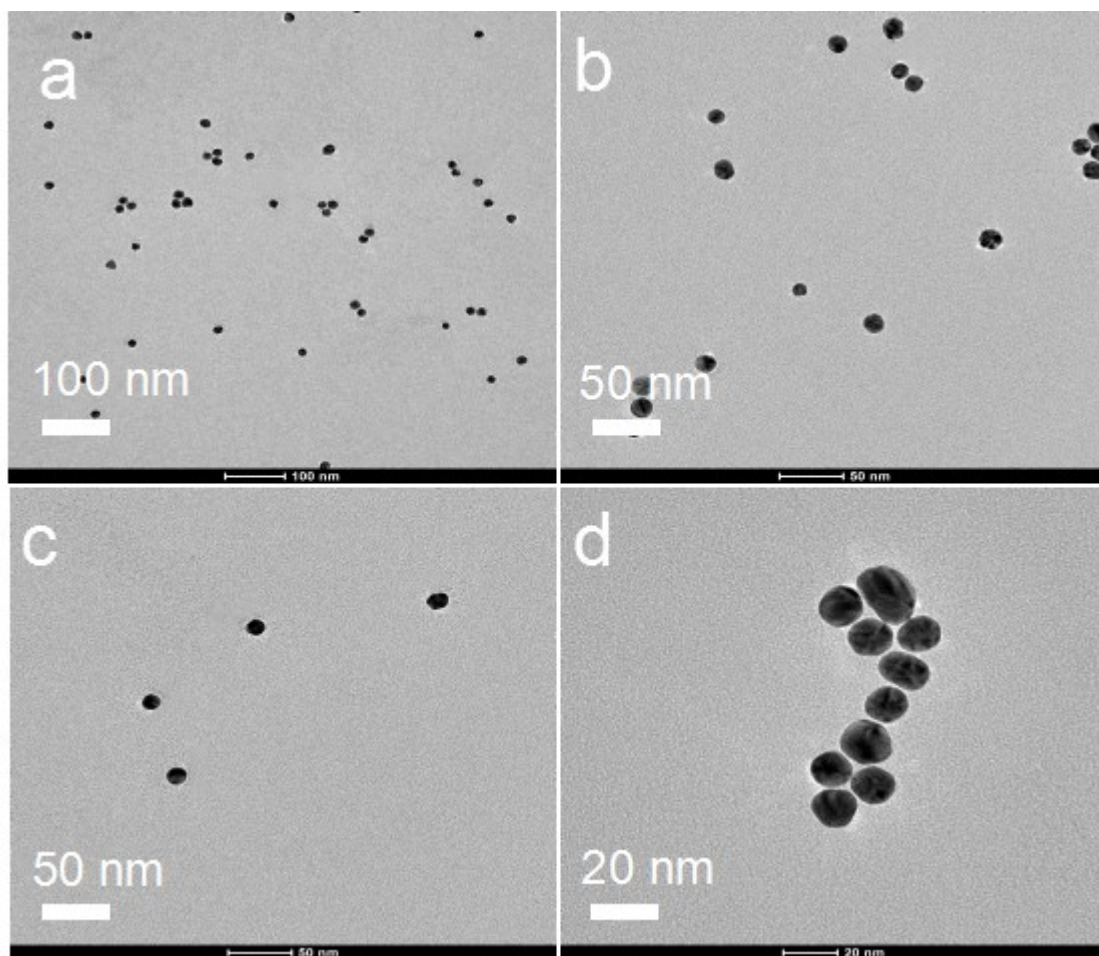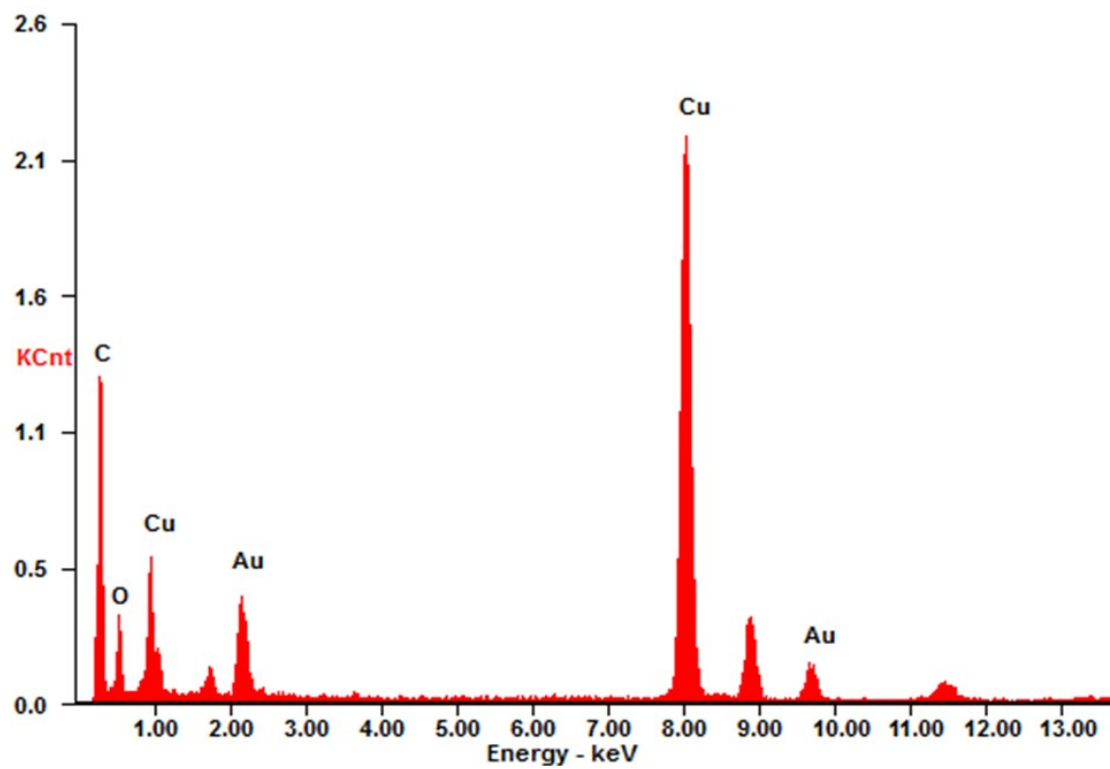

Fig. S8 TEM of Au nanoparticles and its corresponding energy dispersion x-ray spectrum.



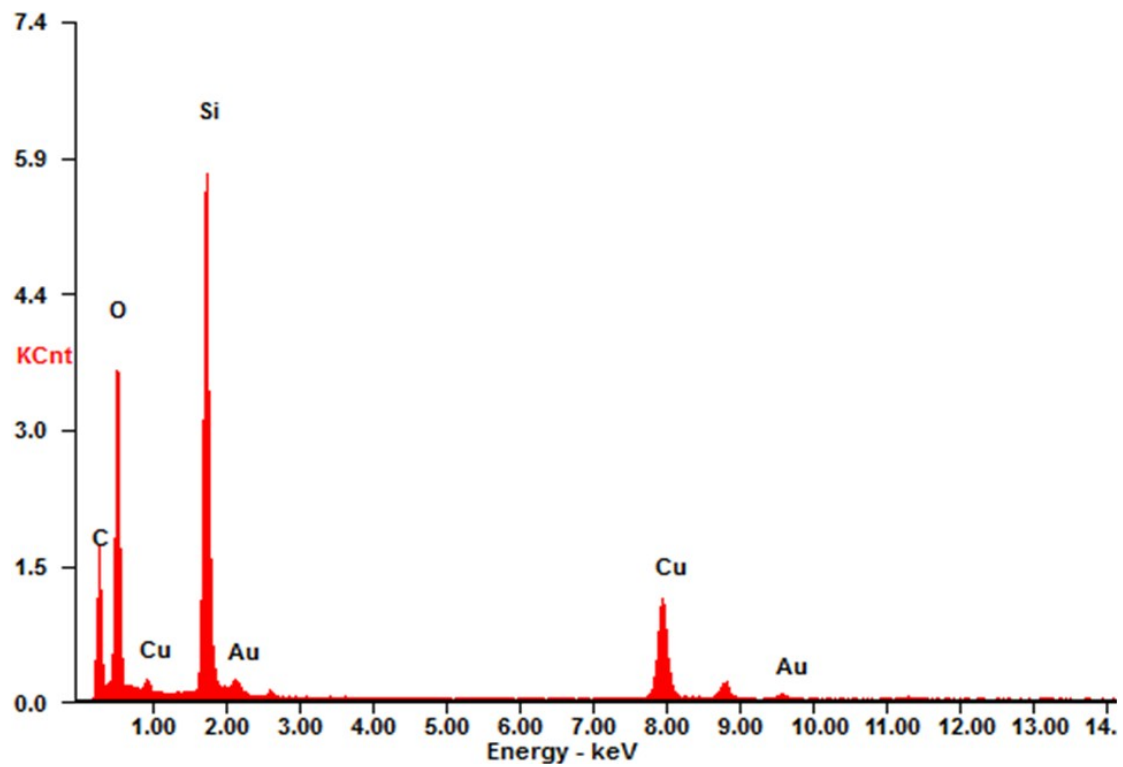

**Fig. S9** Energy dispersion x-ray spectrum of Au nanoparticles adsorbed e-GMP-a

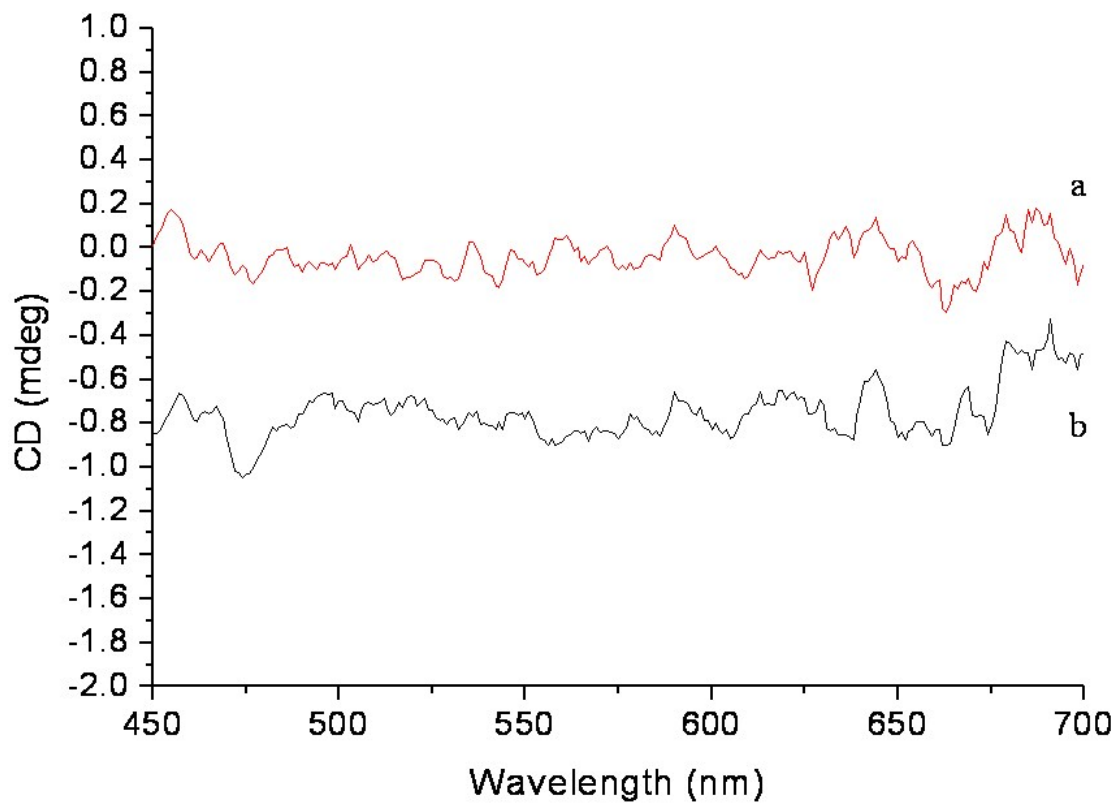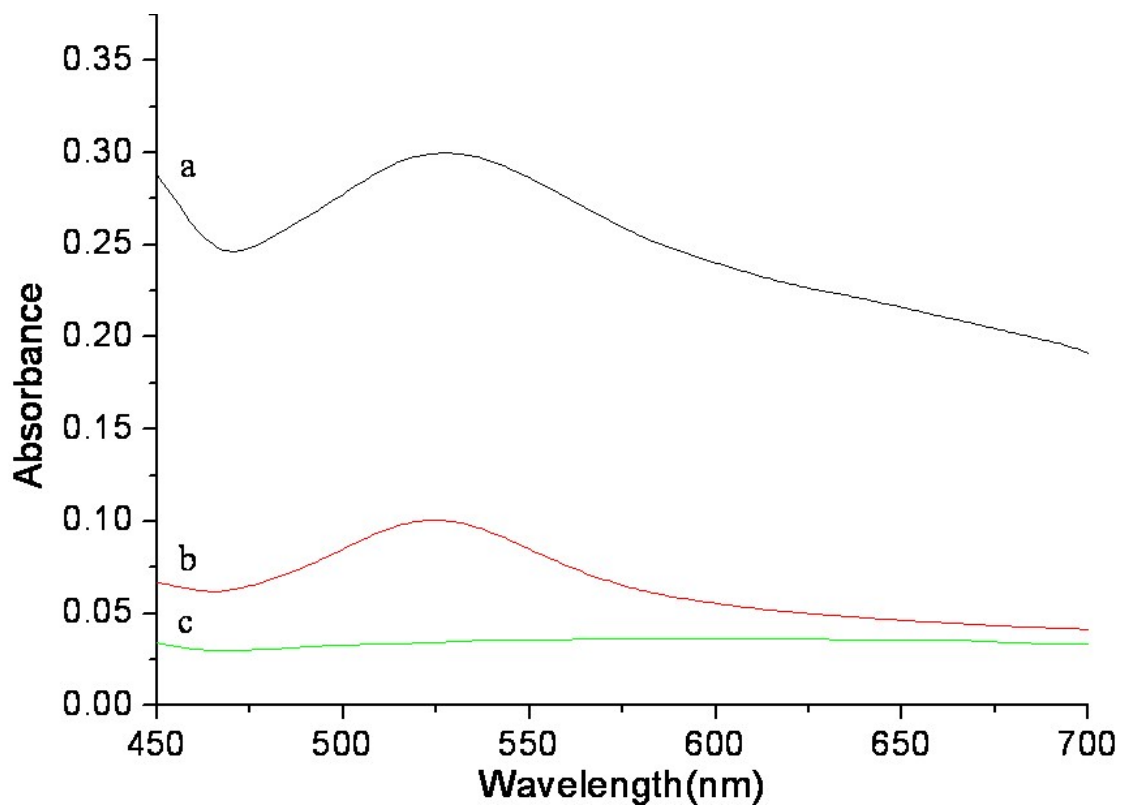

**Fig. S10** Circular dichroism curve of Au nanoparticles (a) and Au nanoparticles adsorbed eGMP-a (b) and their corresponding absorbance curve of Au nanoparticles (b) and Au nanoparticles adsorbed eGMP-a (a); curve c is the absorbance of supernatant of Au nanoparticles adsorbed eGMP-a solution after half an hour stationary.

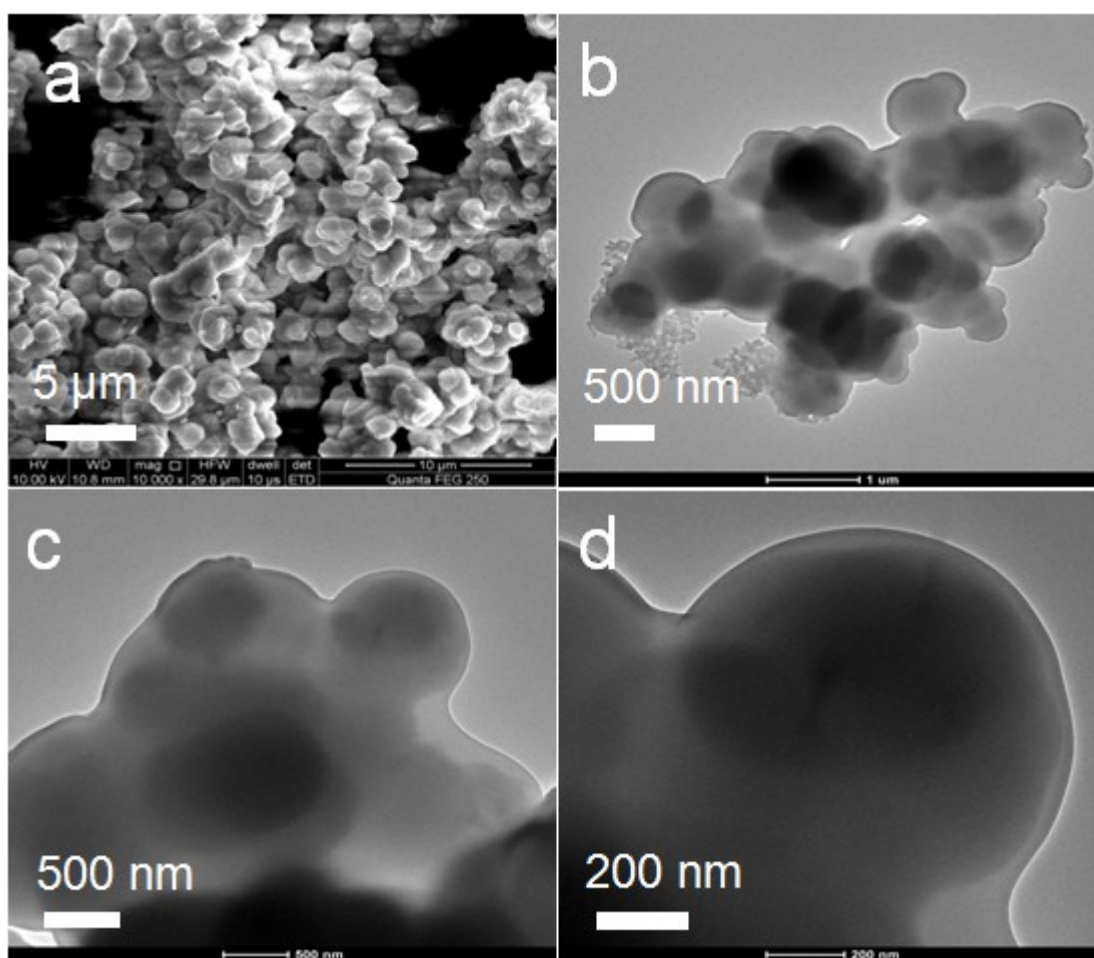

**Fig. S11** SEM image of method b prepared samples before hydrothermal treated (as-obtained-b) and its corresponding TEM images.

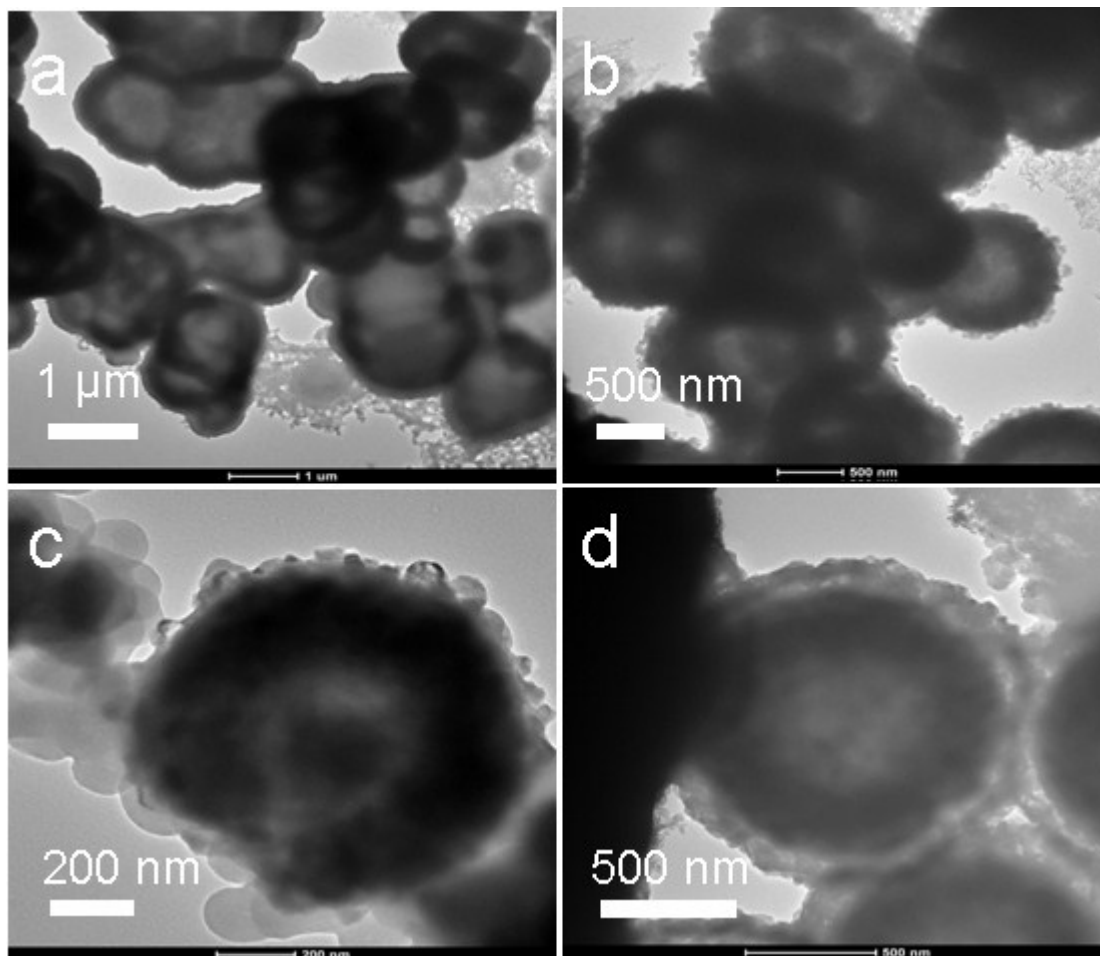

**Fig. S12** TEM images of hGMP-b.

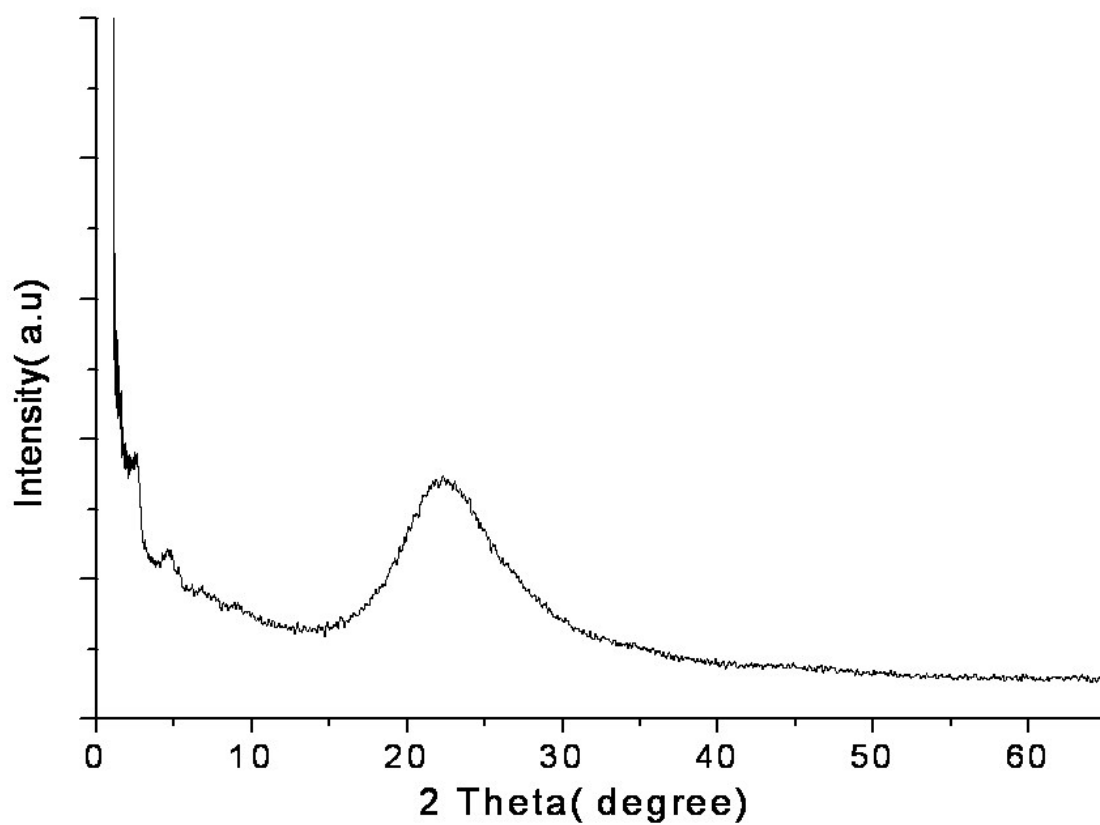

Fig. S13 XRD Pattern of cGMP-b.
